# Supplementary material for: Porphyromonas gingivalis Type IX Secretion Substrates Are Cleaved and Modified by a Sortase-Like Mechanism
Source: PubMed Central journal article supplement (PMC4560394; doi:10.1371/journal.ppat.1005152), 2015-09-04

Supplementary Fig. 5

MS/MS spectra of modified C-terminal peptides of P59  
and Kgp from W50WbaP *P. gingivalis* strain

# (P59)IVWSDTQWTHANGVK

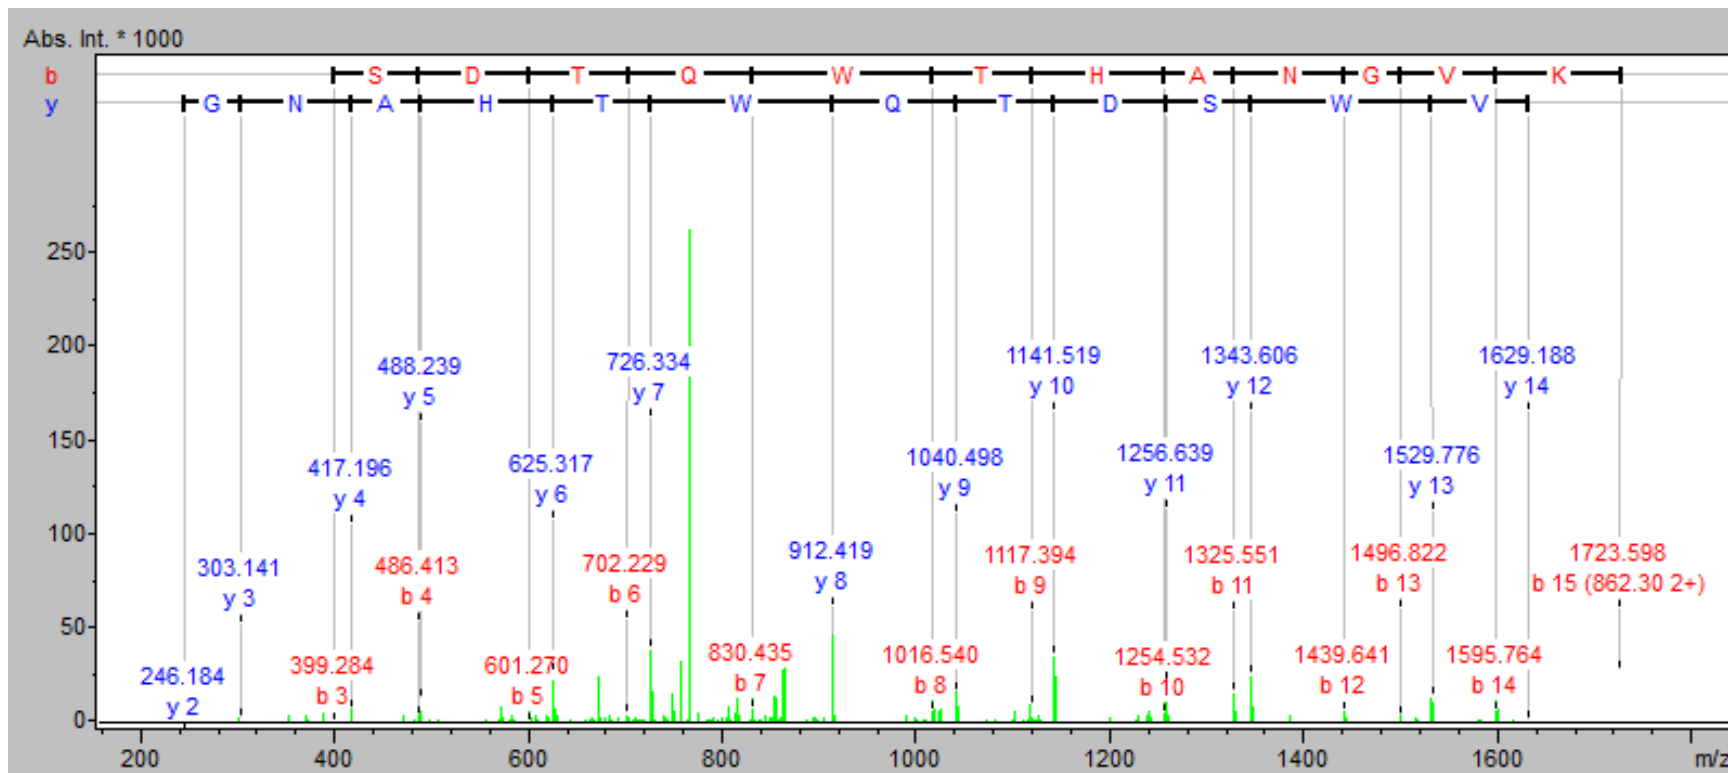

# (P59)IVWSDTQWTHANGI

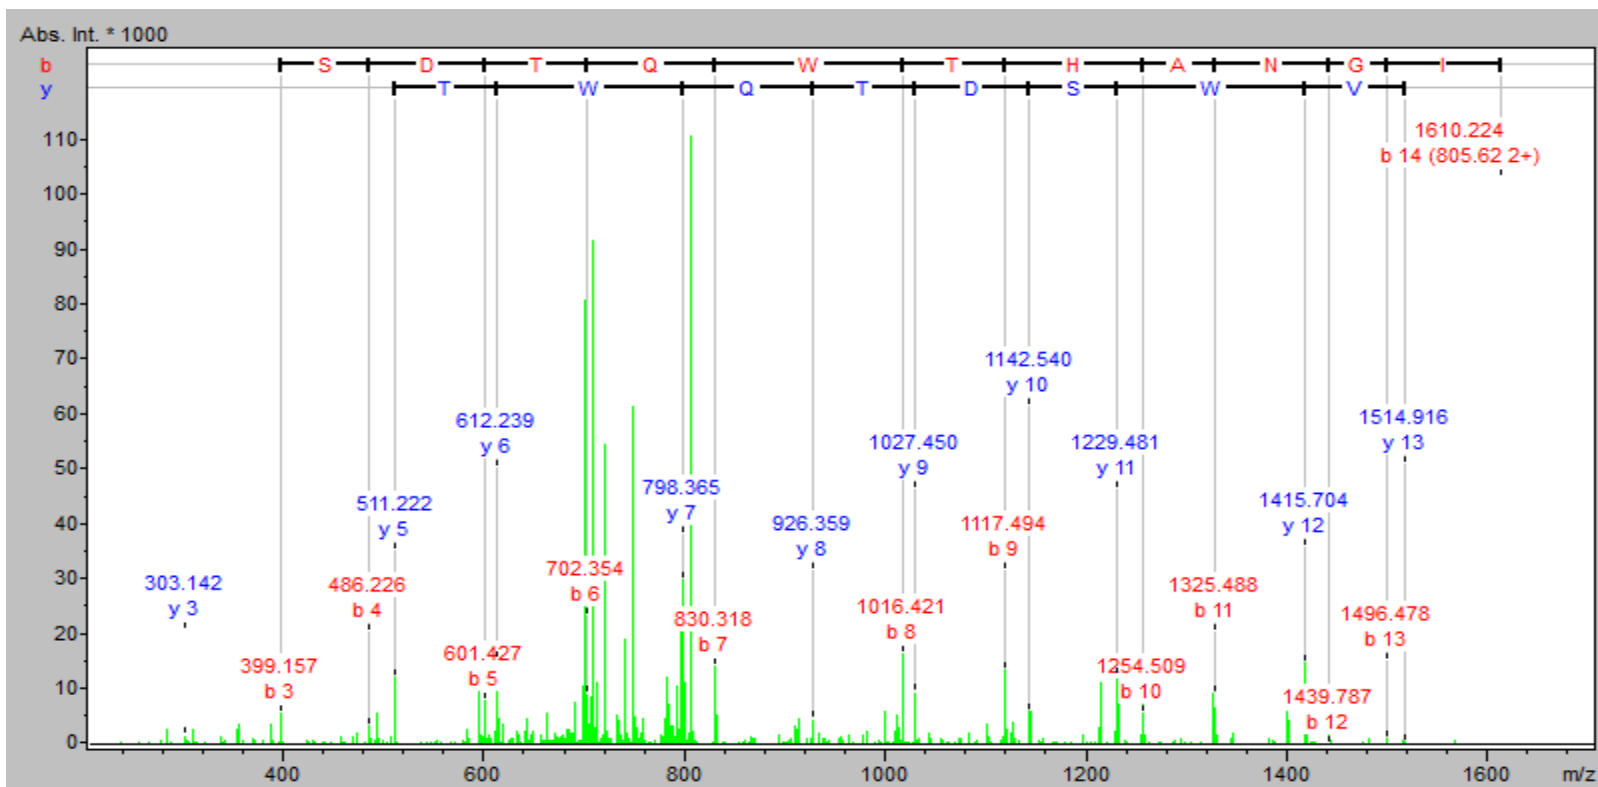

# (P59)IVWSDTQWTHANGF

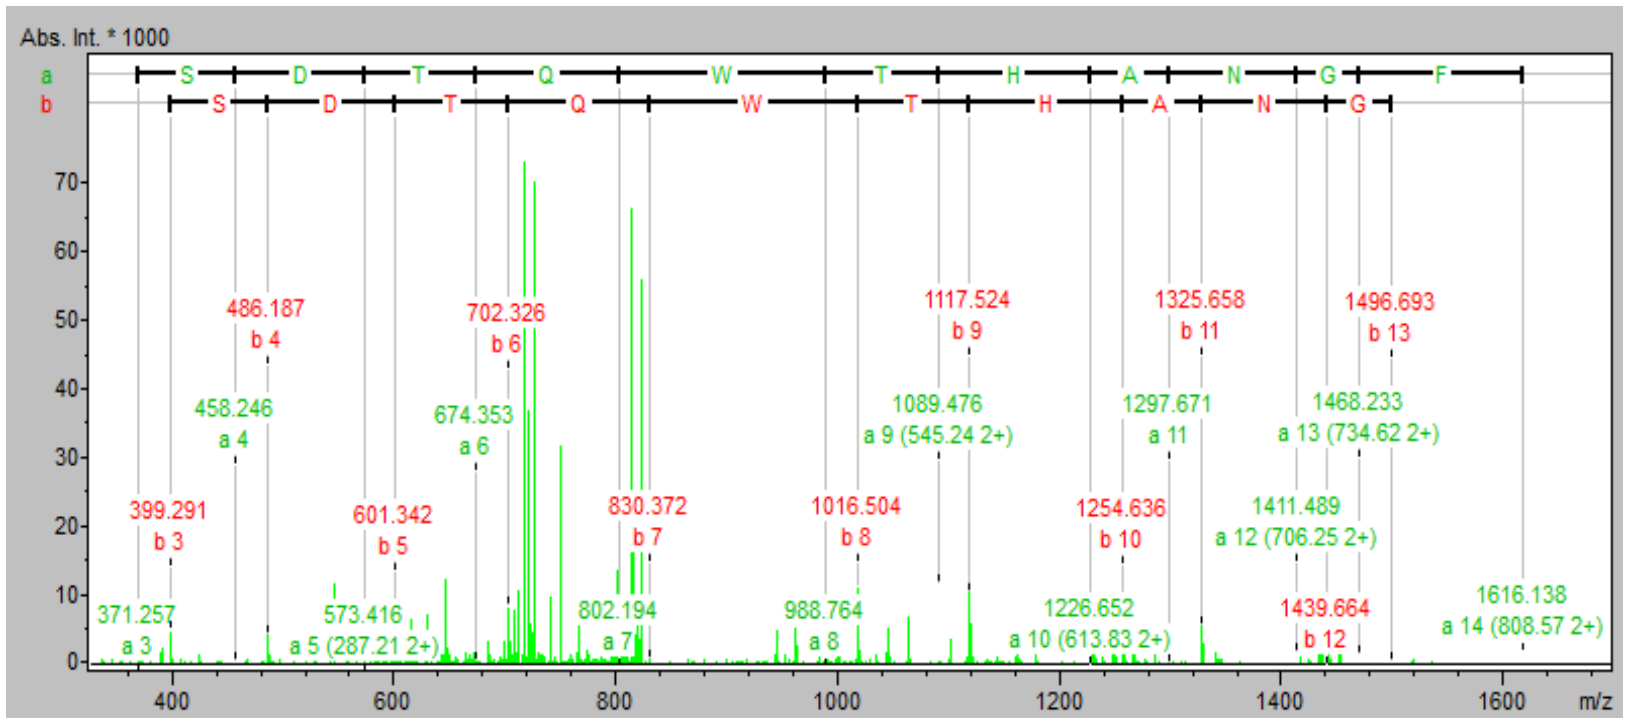

(Kgp)VVYPNGESAIETATLNITSK

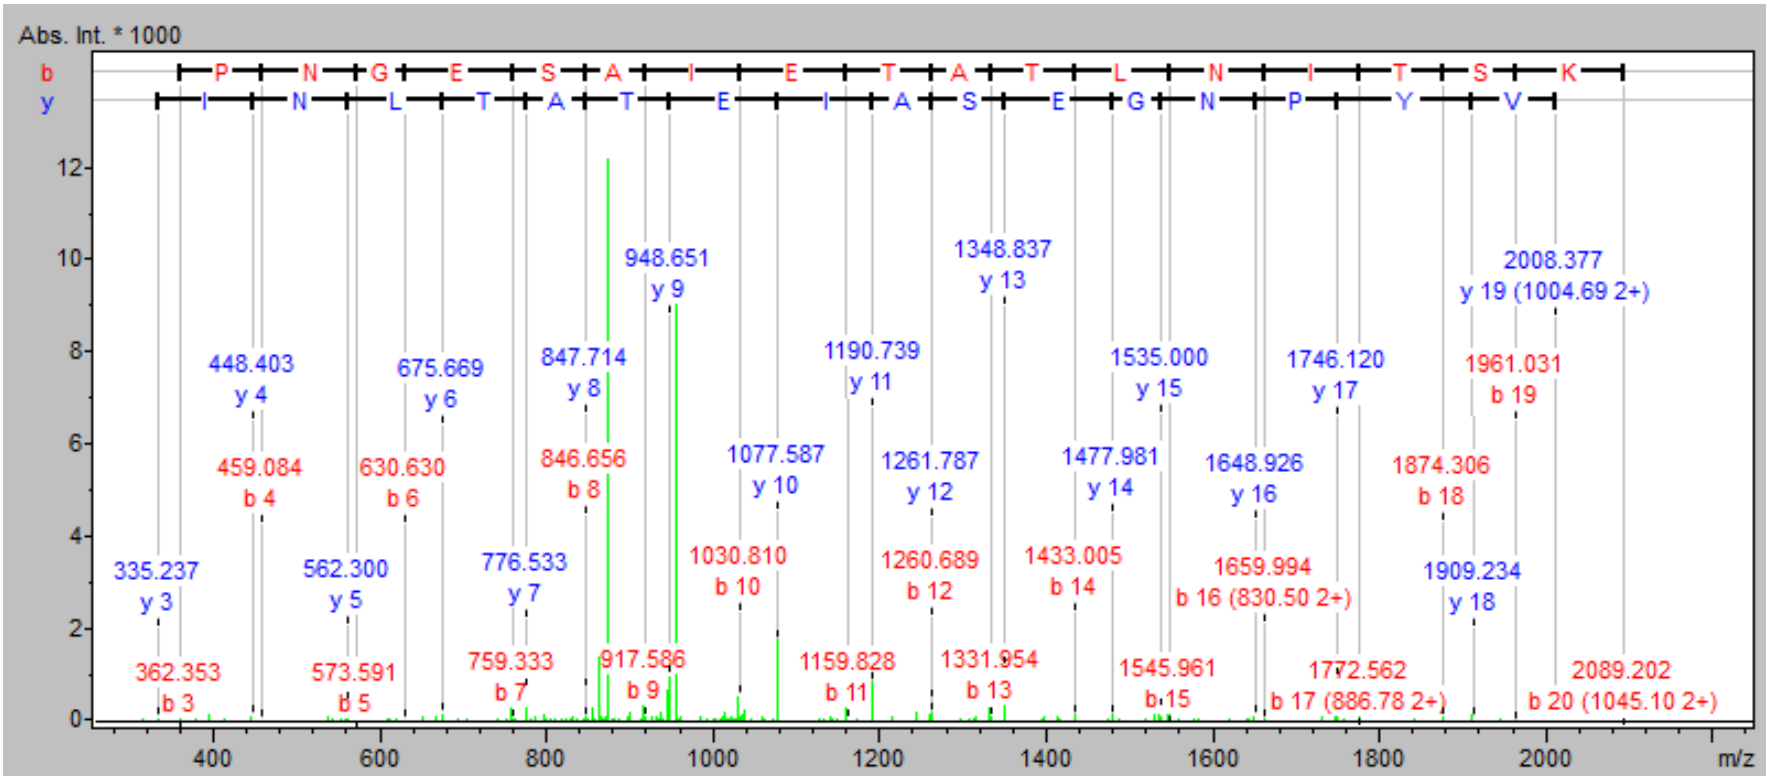

(Kgp)VVYPNGESAIETATLNITR

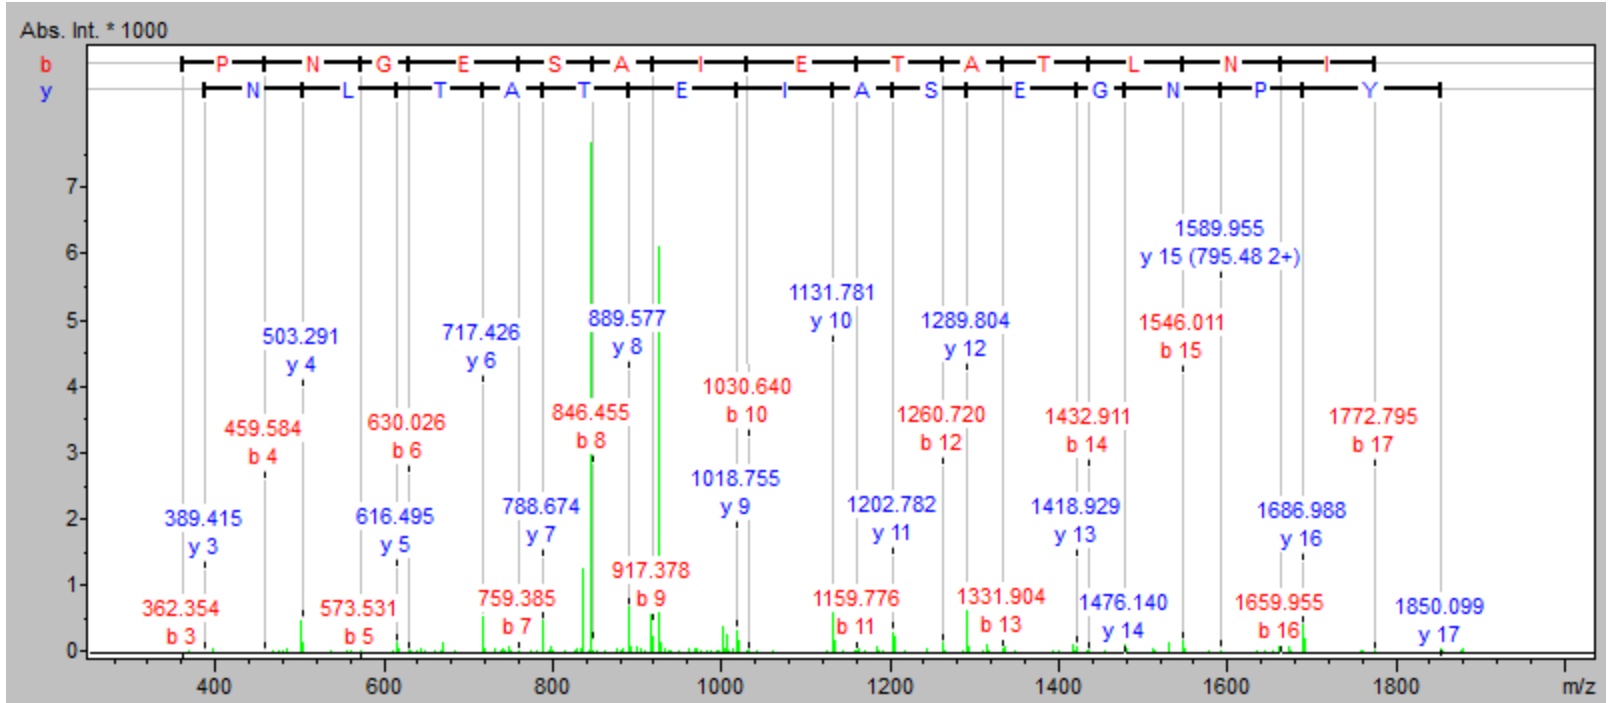

(Kgp)VVYPNGESAIETATLNITSR

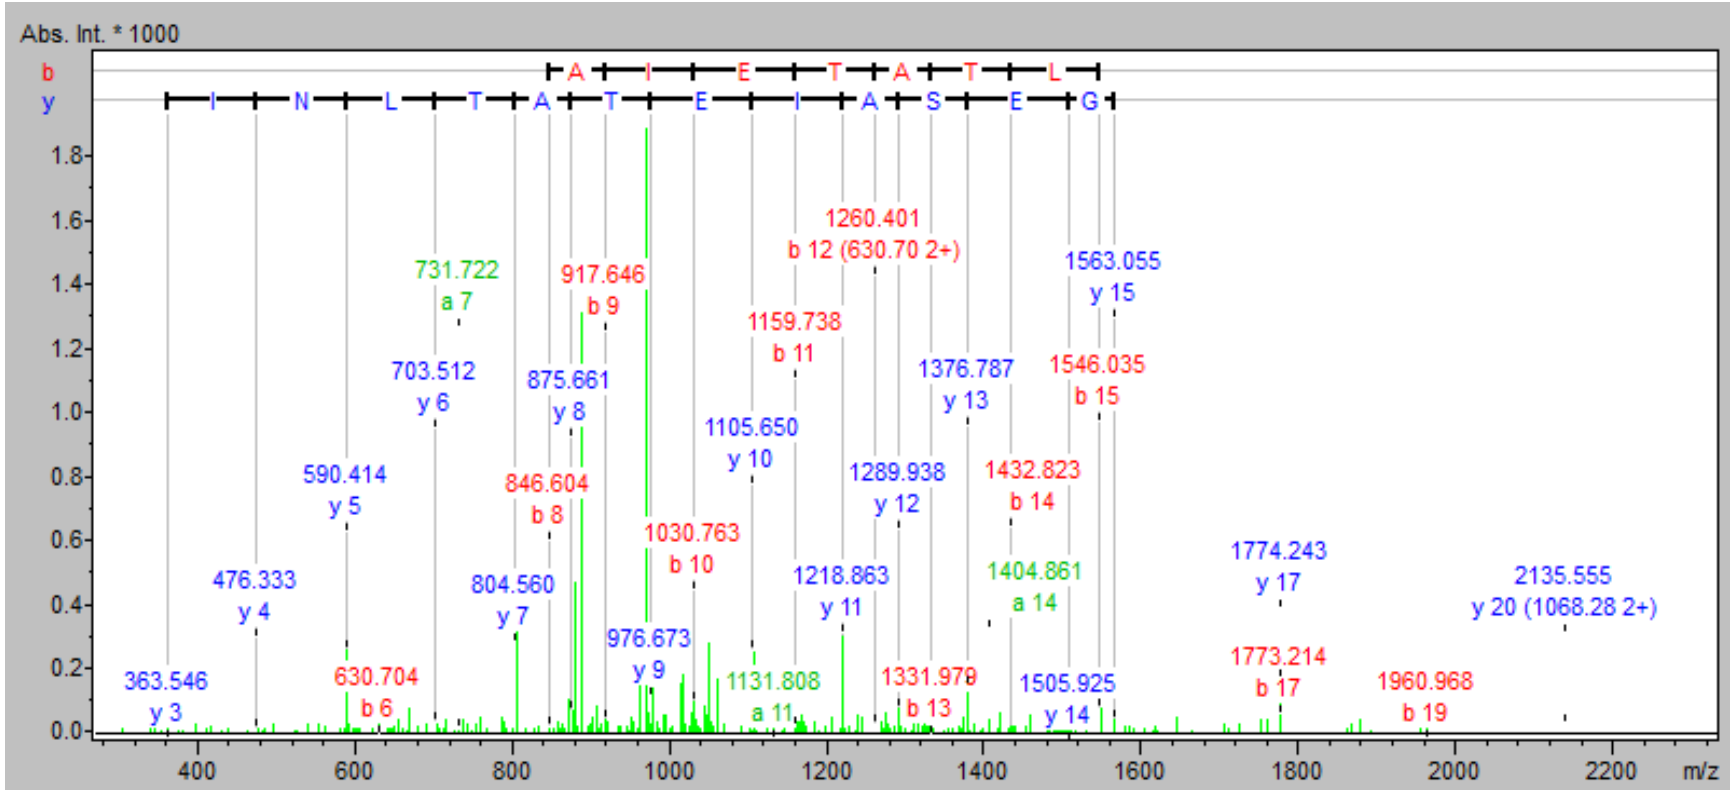

(Kgp)VVYPNGESAIETATLNITGKI

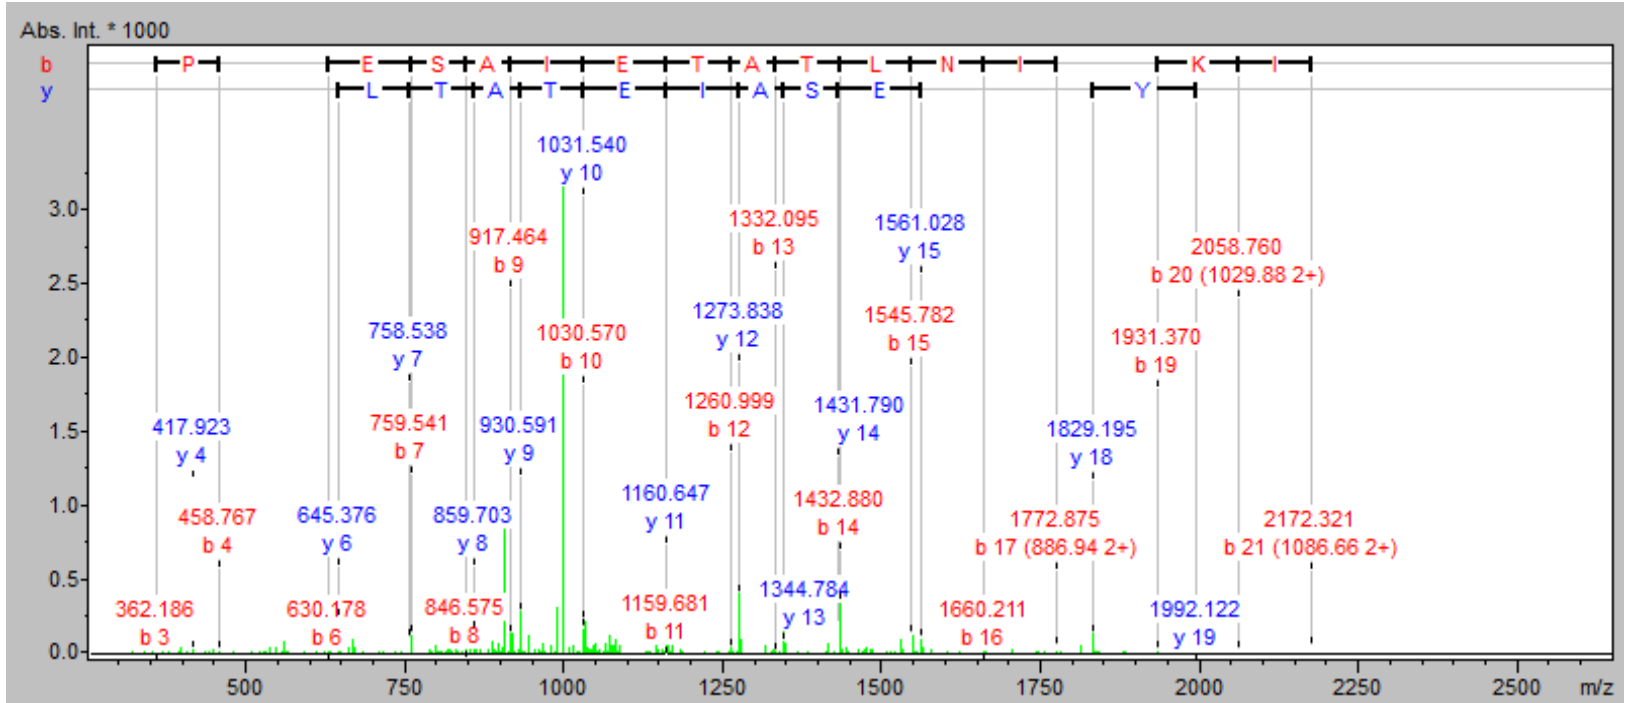

Supplement: ppat.1005152.s005.pdf [file ppat.1005152.s005.pdf]
